# Supplementary material
Source: PubMed Central journal article supplement (PMC1959424)

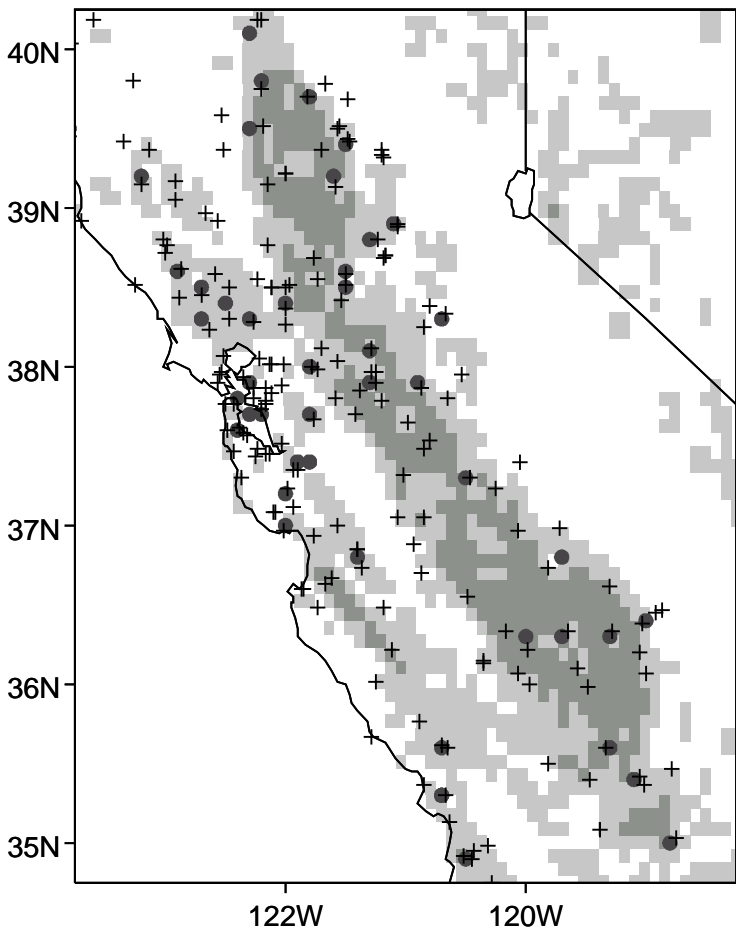

Supplement: pnas_0700144104_1.pdf [file pnas_0700144104_1.pdf]

1. CRU2.0

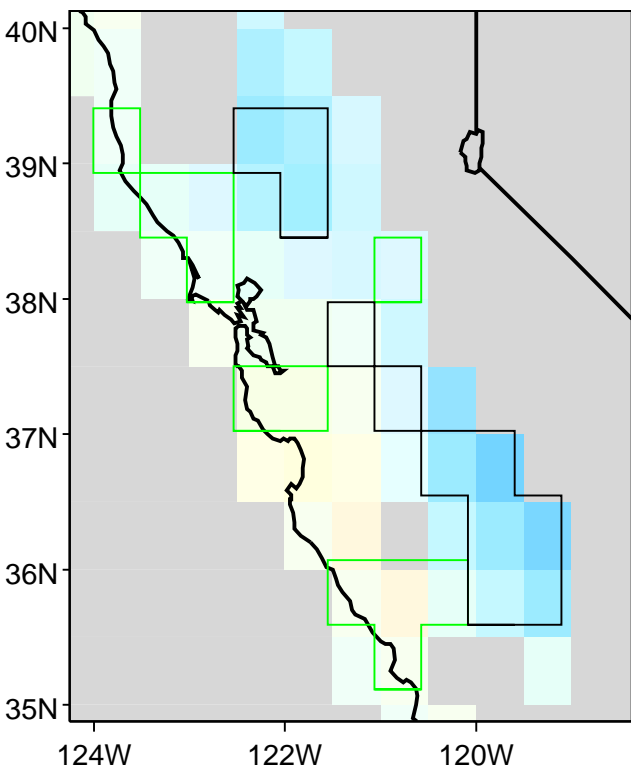

2. CRU2.1

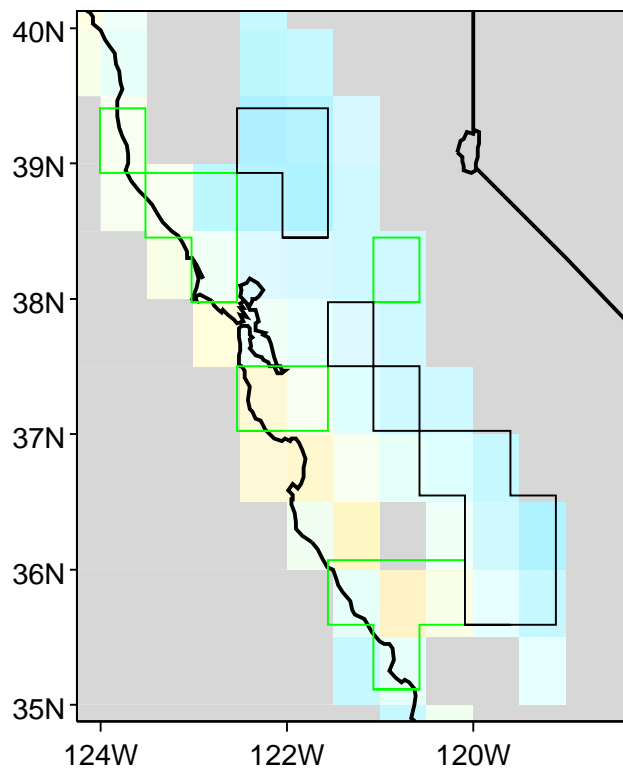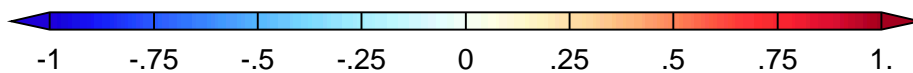

3. PRISM

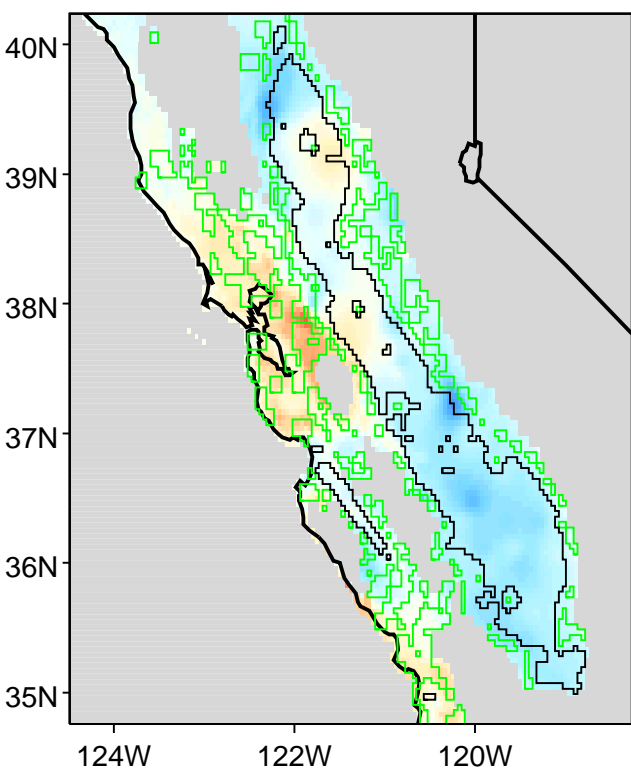

4. UW

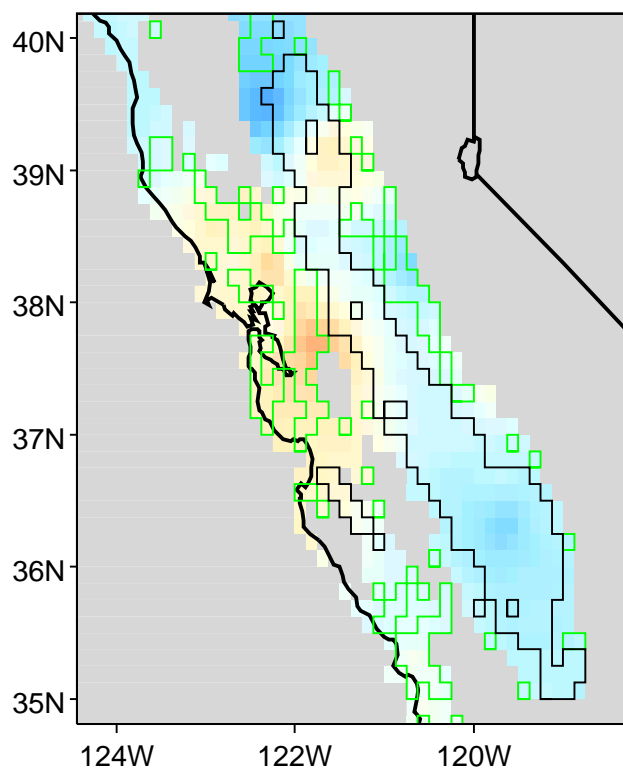

Supplement: pnas_0700144104_2.pdf [file pnas_0700144104_2.pdf]
